# Supplementary figures and images for: Palladium–gold oxo complexes
Source: Royal Society of Chemistry journal article supplement (doi:10.1039/b504808g), 2005-01-01

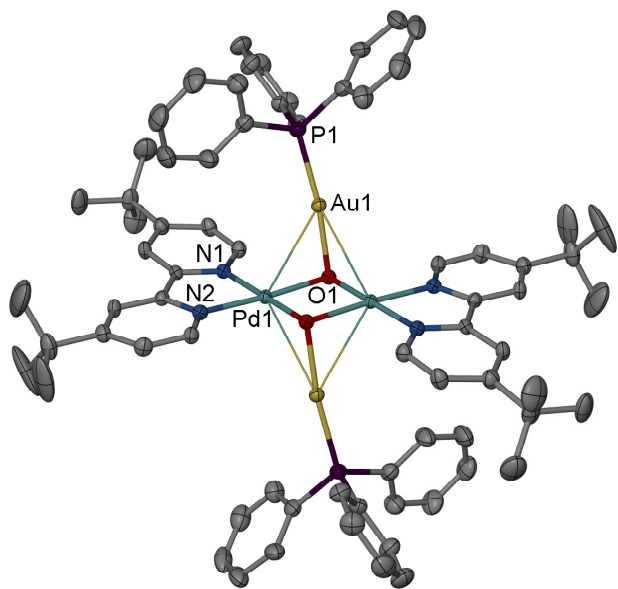

Fig. 1

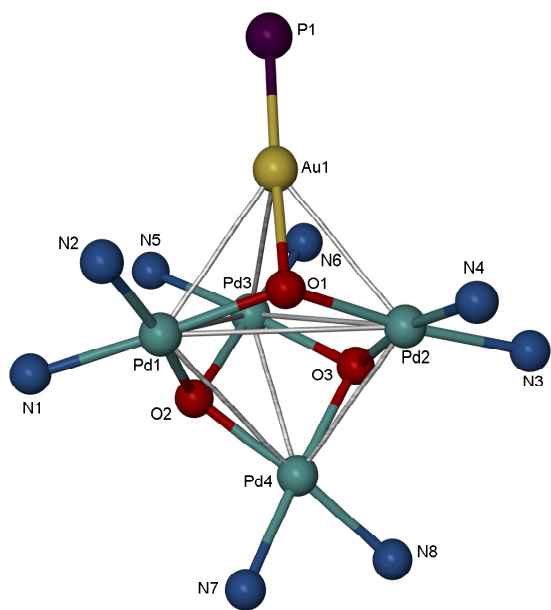

Fig. 2

Supplement: b504808g1.pdf [file b504808g1.pdf]
